# Supplementary material for: Mitochondrial fusion but not fission regulates larval growth and synaptic development through steroid hormone production
Source: eLife journal article supplement (doi:10.7554/elife.03558), 2014-10-14
Supplement: supp [file elife-03558-supp-v1.zip]

Archive with 11 entries (11 files):
- elife_poa_e03558_Figure_3_figure_supplement_2.pdf
- elife_poa_e03558_Figure_7_figure_supplement_2.pdf
- elife_poa_e03558_Figure_5_source_data_2.pdf
- elife_poa_e03558_Figure_1_figure_supplement_1.pdf
- elife_poa_e03558_Figure_2_source_data_1.pdf
- elife_poa_e03558_Figure_6_figure_supplement_1.pdf
- elife_poa_e03558_Figure_5_source_data_1.pdf
- elife_poa_e03558_Figure_3_figure_supplement_1.pdf
- elife_poa_e03558_Figure_2_source_data_2.pdf
- elife_poa_e03558_Figure_5_figure_supplement_1.pdf
- elife_poa_e03558_Figure_7_figure_supplement_1.pdf
