# Supplementary material for: Mitochondrial fusion but not fission regulates larval growth and synaptic development through steroid hormone production
Source: eLife journal article supplement (doi:10.7554/elife.03558), 2014-10-14

Figure 1-figure supplement 1

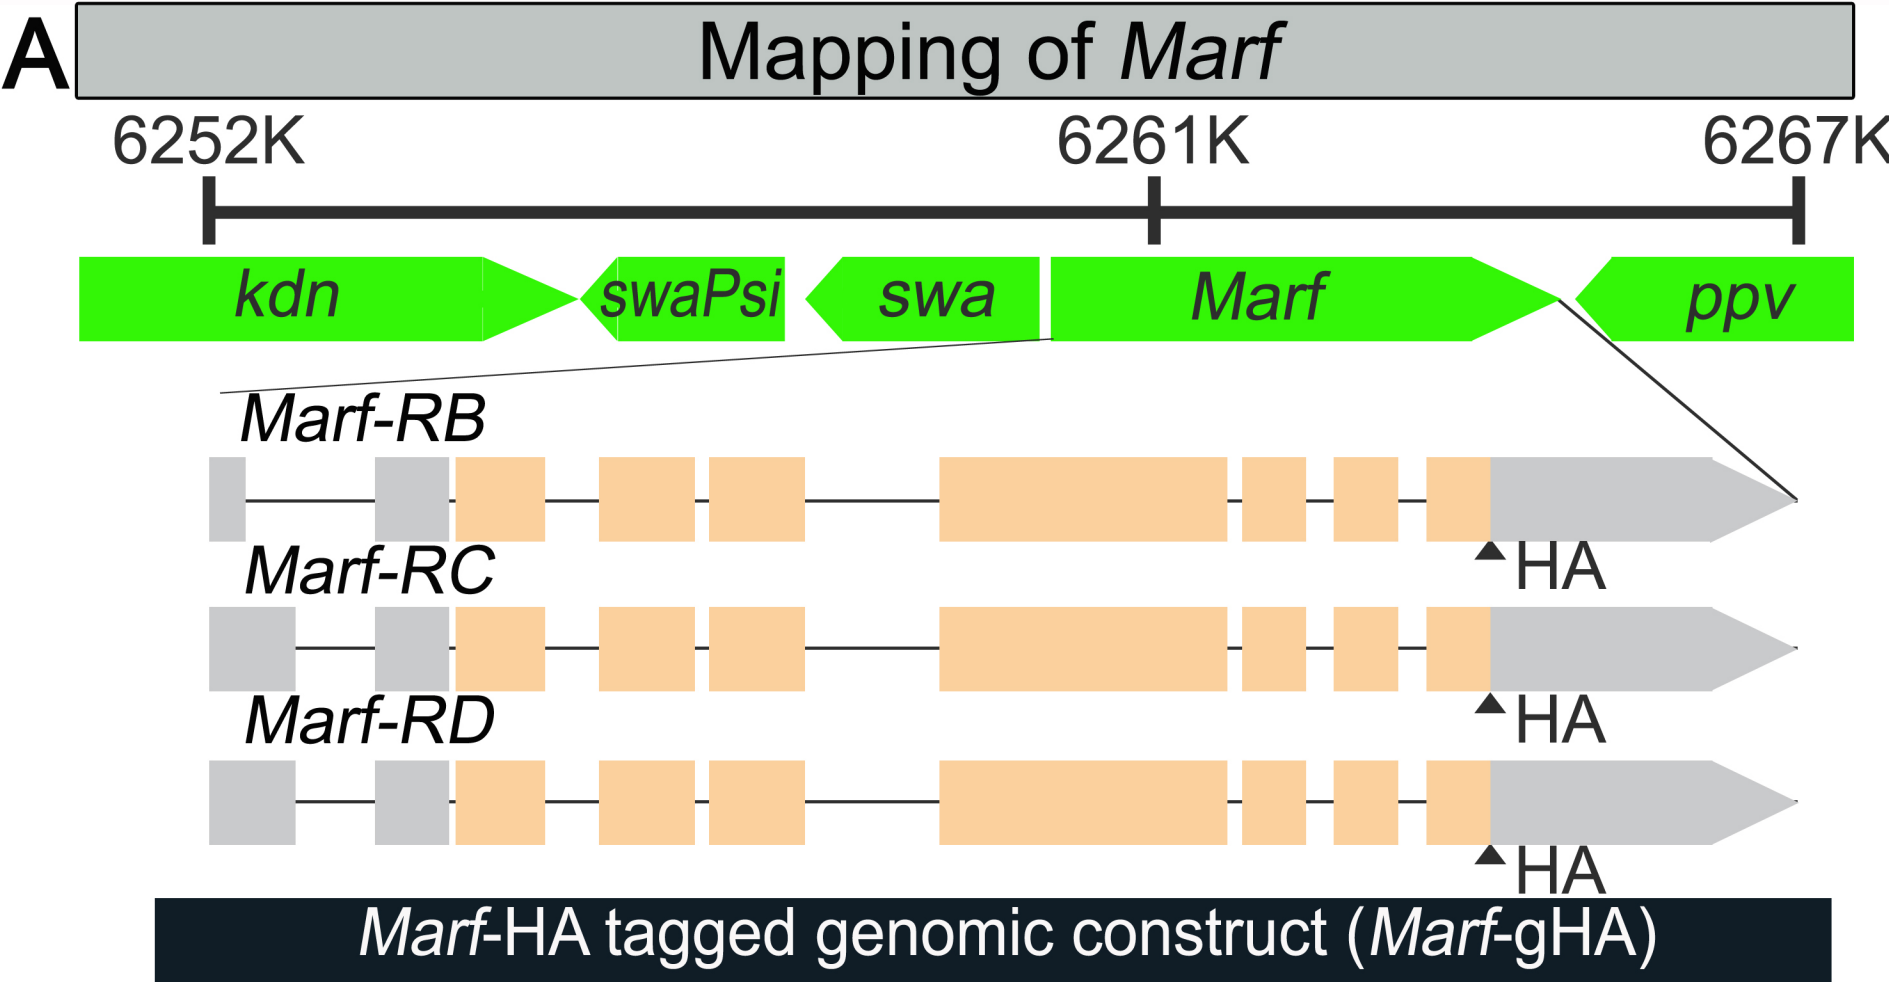

**B** Lethal stage analysis of *Marf* mutant alleles

| <i>Marf</i> alleles |                                           | A   | B   | C     | E   | F   | G   | H                  |
|---------------------|-------------------------------------------|-----|-----|-------|-----|-----|-----|--------------------|
| Lethal phase        |                                           | L3* | L3* | Pupae | L3* | L3* | L3* | Pupae <sup>†</sup> |
| Lethality           | <i>Df(1)Exel6239</i>                      | L3* | L3* | Pupae | L3* | L3* | L3* | Pupae <sup>†</sup> |
|                     | <i>Marf</i> -genomicHA                    | +   | +   | +     | +   | +   | +   | +                  |
|                     | <i>Tub</i> or <i>DA</i> > <i>Marf</i> -HA | +   | +   | +     | +   | +   | +   | +                  |
|                     | <i>Tub</i> or <i>DA</i> > <i>hMFN1</i>    | ND  | -   | ND    | -   | ND  | -   | ND                 |
|                     | <i>Tub</i> or <i>DA</i> > <i>hMFN2</i>    | ND  | -   | ND    | -   | ND  | -   | ND                 |
|                     | <i>DA</i> > <i>hMFN1,hMFN2</i>            | ND  | +   | ND    | ND  | ND  | ND  | ND                 |

L3 = Third instar larva, \* = Lengthen L3 and <sup>†</sup> = Escapers  
Tub = Tubulin Gal4 and DA = Daughterless Gal4  
+ = Rescue, - = Not rescue and ND = Not determined

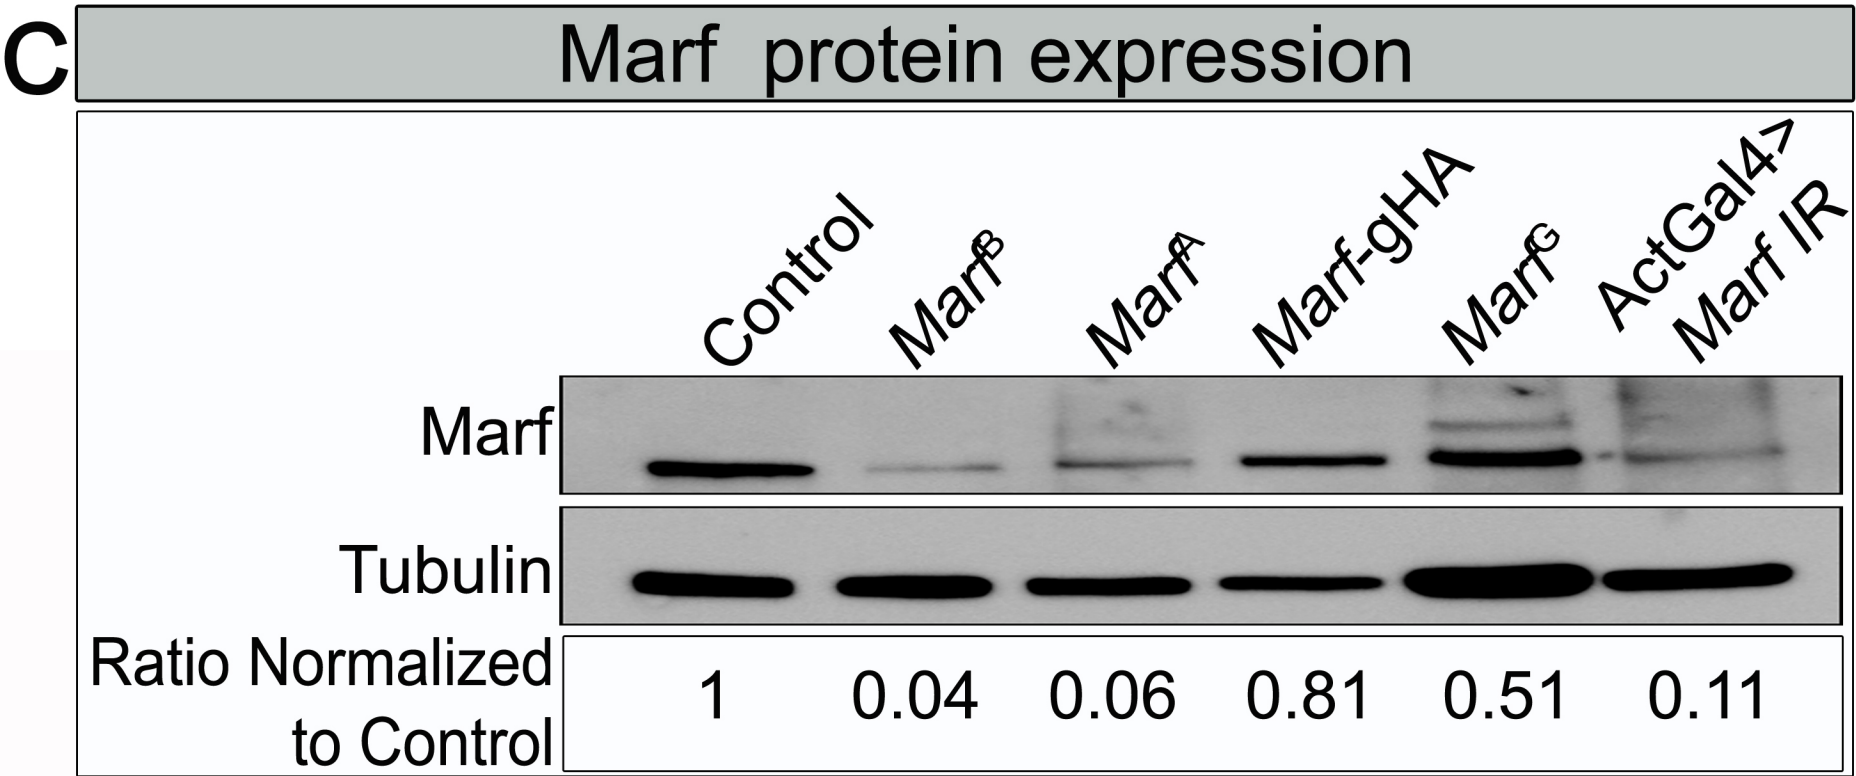

Supplement: supp [file elife-03558-supp-v1.zip › elife_poa_e03558_Figure_1_figure_supplement_1.pdf]
