# Supplementary material for: Mitochondrial fusion but not fission regulates larval growth and synaptic development through steroid hormone production
Source: eLife journal article supplement (doi:10.7554/elife.03558), 2014-10-14
Supplement: supp [file elife-03558-supp-v1.zip › elife_poa_e03558_Figure_2_source_data_1.pdf]

**Figure 2-source data 1**

| <b>Lethal stage analysis of <i>Drp1</i> mutant alleles</b> |                                |                                |                                      |                                    |
|------------------------------------------------------------|--------------------------------|--------------------------------|--------------------------------------|------------------------------------|
| <b><i>Drp1</i> Alleles</b>                                 | <b><i>Drp1</i><sup>1</sup></b> | <b><i>Drp1</i><sup>2</sup></b> | <b><i>Drp1</i><sup>KG38015</sup></b> | <b><i>Drp1</i><sup>[T26]</sup></b> |
| <b><i>Drp1</i><sup>1</sup></b>                             | L1                             | Pupae                          | ND                                   | ND                                 |
| <b><i>Drp1</i><sup>2</sup></b>                             | Pupae                          | Pupae <sup>†</sup>             | L3                                   | L3                                 |
| <b><i>Drp1</i><sup>KG38015</sup></b>                       | ND                             | L3                             | Embryo                               | L1                                 |
| <b><i>Drp1</i><sup>[T26]</sup></b>                         | ND                             | L3                             | L1                                   | L1                                 |

L3=Third instar larvae, <sup>†</sup>=Adult Escapers, ND=Not determined and L1=First instar Larvae
