# Supplementary material for: Mitochondrial fusion but not fission regulates larval growth and synaptic development through steroid hormone production
Source: eLife journal article supplement (doi:10.7554/elife.03558), 2014-10-14
Supplement: supp [file elife-03558-supp-v1.zip › elife_poa_e03558_Figure_2_source_data_2.pdf]

**Figure 2-source data 2**

| Phenotypic analysis of <i>Marf</i> and <i>Drp1</i> mutant alleles |                            |                           |               |                  |                          |               |
|-------------------------------------------------------------------|----------------------------|---------------------------|---------------|------------------|--------------------------|---------------|
| Alleles/<br>Experimental<br>Assays                                | Mitochondria<br>Morphology | MMP                       | ATP<br>Levels | ROS<br>Intensity | Bouton<br>Quantification | 20E<br>Levels |
| <b>Control</b>                                                    | -                          | 1±0.05                    | 0.97±0.06     | 1±0.08           | 108±7.57                 | 25.5±2.42     |
| <b><i>Marf<sup>B</sup></i></b>                                    | Fragmented                 | P=1.1±0.03<br>NP=0.6±0.06 | 0.57±0.03     | 2.7±0.23         | 194±9.06                 | 6.61±0.22     |
| <b><i>Drp1<sup>2</sup></i></b>                                    | Fused                      | 1.2±0.06                  | 0.63±0.09     | 1.78±0.14        | 99±8.28                  | 28.3±1.85     |
| <b><i>Drp1<sup>1</sup>/Drp1<sup>2</sup></i></b>                   | Fused                      | 1.3±0.11                  | 0.58±0.03     | 1.85±0.18        | 112±10.40                | 22.1±2.27     |
| <b><i>Drp1<sup>126</sup>/Drp1<sup>2</sup></i></b>                 | Fused                      | 1.2±0.01                  | 0.57±0.05     | 1.94±0.22        | 104±6.05                 | 24.6±1.92     |
| <b><i>Drp1<sup>KG38015</sup>/Drp1<sup>2</sup></i></b>             | Fused                      | 1.3±0.11                  | 0.54±0.02     | 2.1±0.09         | 103±5.46                 | 23.8±1.97     |
| <b><i>Marf<sup>B</sup>;Drp1<sup>2</sup></i></b>                   | Fragmented                 | P=1.1±0.08<br>NP=0.5±0.04 | 0.41±0.04     | 4.61±0.24        | 209±11.43                | 7.32±0.68     |

MMP=Mitochondria Membrane Potential, ROS=Reactive Oxygen Species, 20E= 20-hydroxyecdysone  
P=Punctate, NP=Not Punctate, MMP, ATP levels and ROS intensity were normalized to controls and all columns are representative of three independent experiments with SEM.
