# Supplementary material for: Mitochondrial fusion but not fission regulates larval growth and synaptic development through steroid hormone production
Source: eLife journal article supplement (doi:10.7554/elife.03558), 2014-10-14
Supplement: supp [file elife-03558-supp-v1.zip › elife_poa_e03558_Figure_5_source_data_1.pdf]

**Figure 5-source data 1**

| Tissue Gal4 screen for rescue of <i>Marf<sup>B</sup></i> mutants lethality and bouton morphology |                                |           |                             |
|--------------------------------------------------------------------------------------------------|--------------------------------|-----------|-----------------------------|
| Tissue Expression <sup>†</sup>                                                                   | Gal4 line(s)                   | Lethality | Bouton Morphology           |
| Ubiquitous                                                                                       | <i>Actin</i> or <i>Tubulin</i> | Adult     | Normal                      |
| Neuron                                                                                           | <i>D42</i> or <i>Nsyb</i>      | L3*       | Increased and small boutons |
| Muscle                                                                                           | <i>C57</i> or <i>Mef2</i>      | L3*       | Increased and small boutons |
| Neuron and Muscle                                                                                | <i>D42</i> and <i>Mef2</i>     | L3*       | Increased and small boutons |
| Glial                                                                                            | <i>Repo</i>                    | L3*       | Increased and small boutons |
| Ring gland (RG)                                                                                  | <i>Feb36</i> or <i>Phm</i>     | Pupa*     | Normal                      |

<sup>†</sup> = Tissue expression based on Bloomington stock report

L3 = Third instar larva stage and \* = Lengthen third instar larva stage
