# Supplementary material for: Mitochondrial fusion but not fission regulates larval growth and synaptic development through steroid hormone production
Source: eLife journal article supplement (doi:10.7554/elife.03558), 2014-10-14
Supplement: supp [file elife-03558-supp-v1.zip › elife_poa_e03558_Figure_5_source_data_2.pdf]

**Figure 5-source data 2**

| Tissue Gal4 screen for lethality and alterations to bouton morphology |                                           |           |                             |
|-----------------------------------------------------------------------|-------------------------------------------|-----------|-----------------------------|
| Tissue Expression <sup>†</sup>                                        | Gal4 line(s)                              | Lethality | Bouton Morphology           |
| Ubiquitous                                                            | <i>Actin</i> or <i>Tubulin</i>            | L3*       | Increased and small boutons |
| Neuron                                                                | <i>D42</i> or <i>Nsyb</i>                 | Pupa      | Normal                      |
| Muscle                                                                | <i>C57</i> or <i>Mef2</i>                 | Adult     | Normal                      |
| Neuron and Muscle                                                     | <i>D42</i> and <i>Mef2</i>                | Pupa      | Normal                      |
| Glial                                                                 | <i>Repo</i>                               | Adult     | Normal                      |
| Fat Body                                                              | <i>Lsp2</i> , <i>r4</i> or <i>Cg</i>      | Adult     | Normal                      |
| Haemocytes                                                            | <i>Cg</i>                                 | Adult     | Normal                      |
| Oenocytes                                                             | <i>Ok376</i> or <i>Ok72</i>               | Adult     | Normal                      |
| Ring gland (RG)                                                       | <i>Feb36</i> , <i>Mai60</i> or <i>Phm</i> | Pupa*     | Increased and small boutons |

<sup>†</sup> = Tissue expression based on Bloomington stock report

L3 = Third instar larva stage and \* = Lengthen third instar larva stage
