# Supplementary material for: Mitochondrial fusion but not fission regulates larval growth and synaptic development through steroid hormone production
Source: eLife journal article supplement (doi:10.7554/elife.03558), 2014-10-14

# Figure 7-figure supplement 2

## Muscle mitochondrial Morphology

*Muscle Driver Alone*

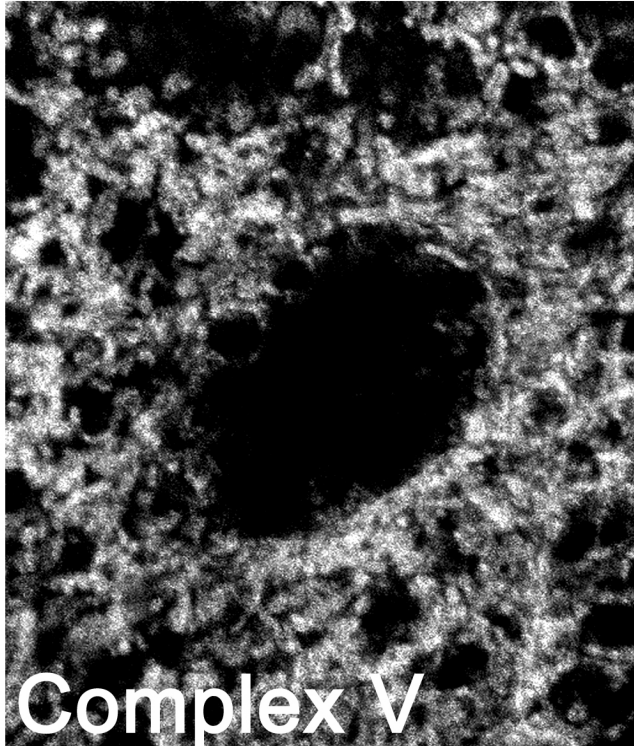

*Marf<sup>B</sup>;Muscle Driver*

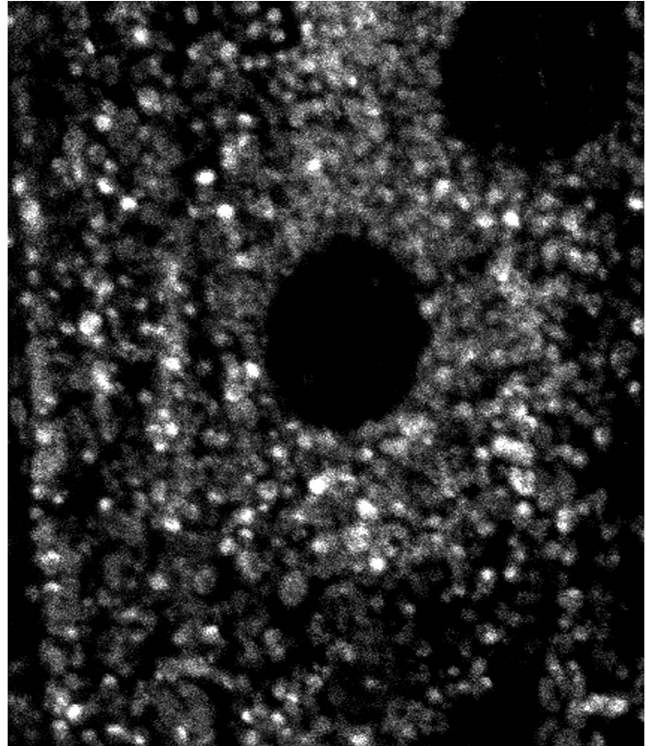

*Marf<sup>B</sup>;Muscle>hMFN1*

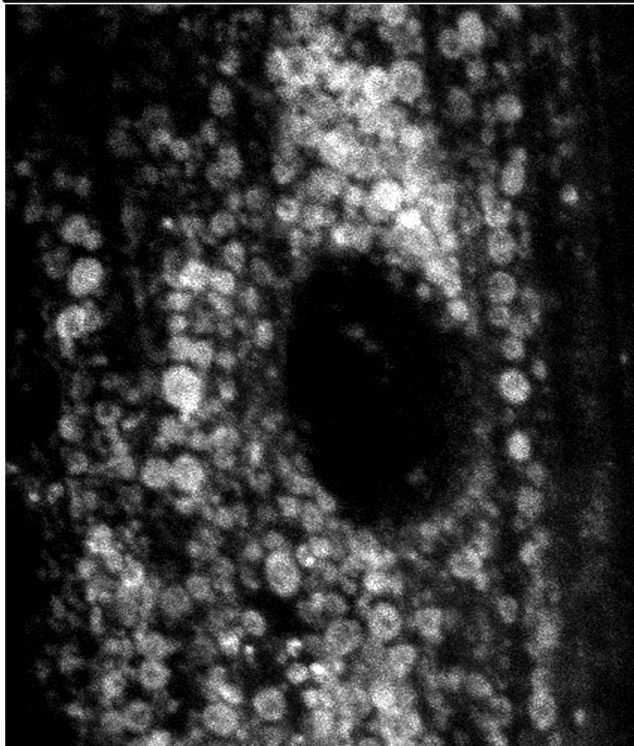

*Marf<sup>B</sup>;Muscle>hMFN2*

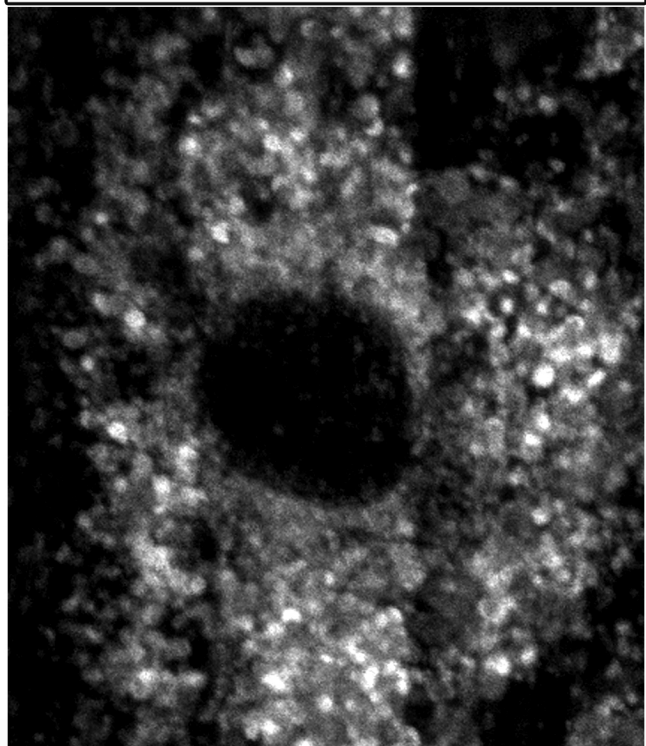

Supplement: supp [file elife-03558-supp-v1.zip › elife_poa_e03558_Figure_7_figure_supplement_2.pdf]
