# Supplementary figures and images for: Mitochondrial fusion but not fission regulates larval growth and synaptic development through steroid hormone production
Source: eLife journal article supplement (doi:10.7554/elife.03558), 2014-10-14

Figure 3-figure supplement 2

**A**

*Marf<sup>B</sup>*; MN-Gal4, UAS-Mito-GFP

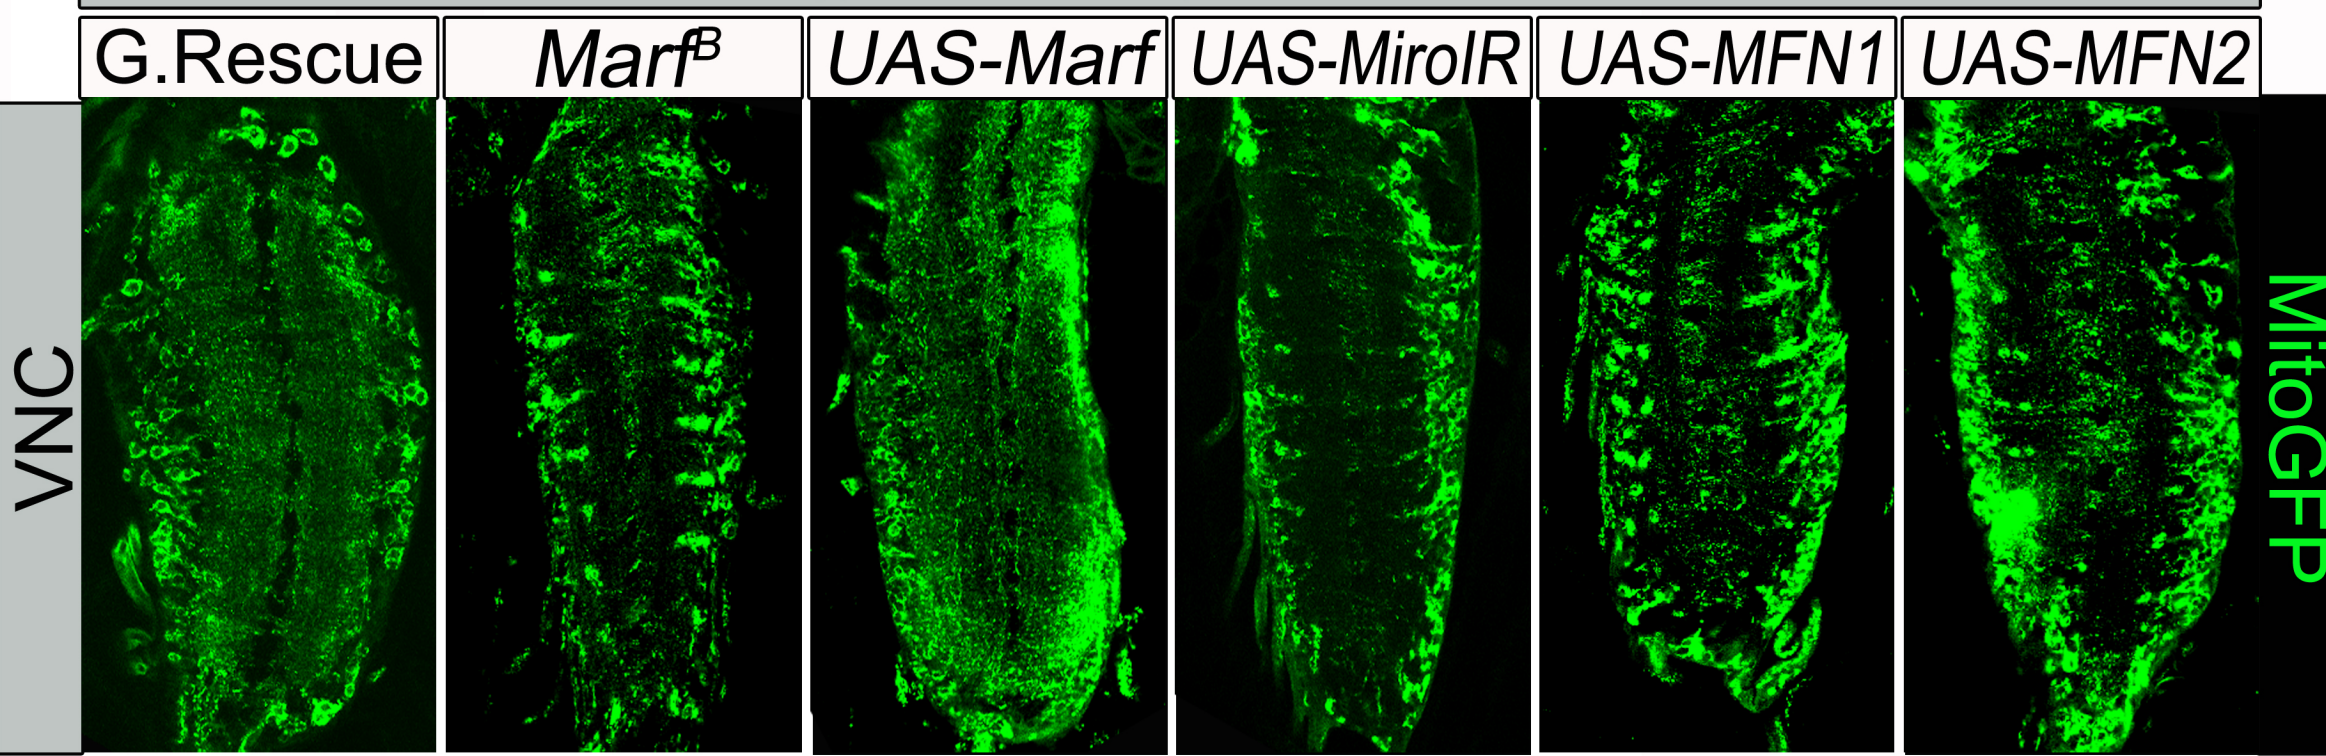

**B**

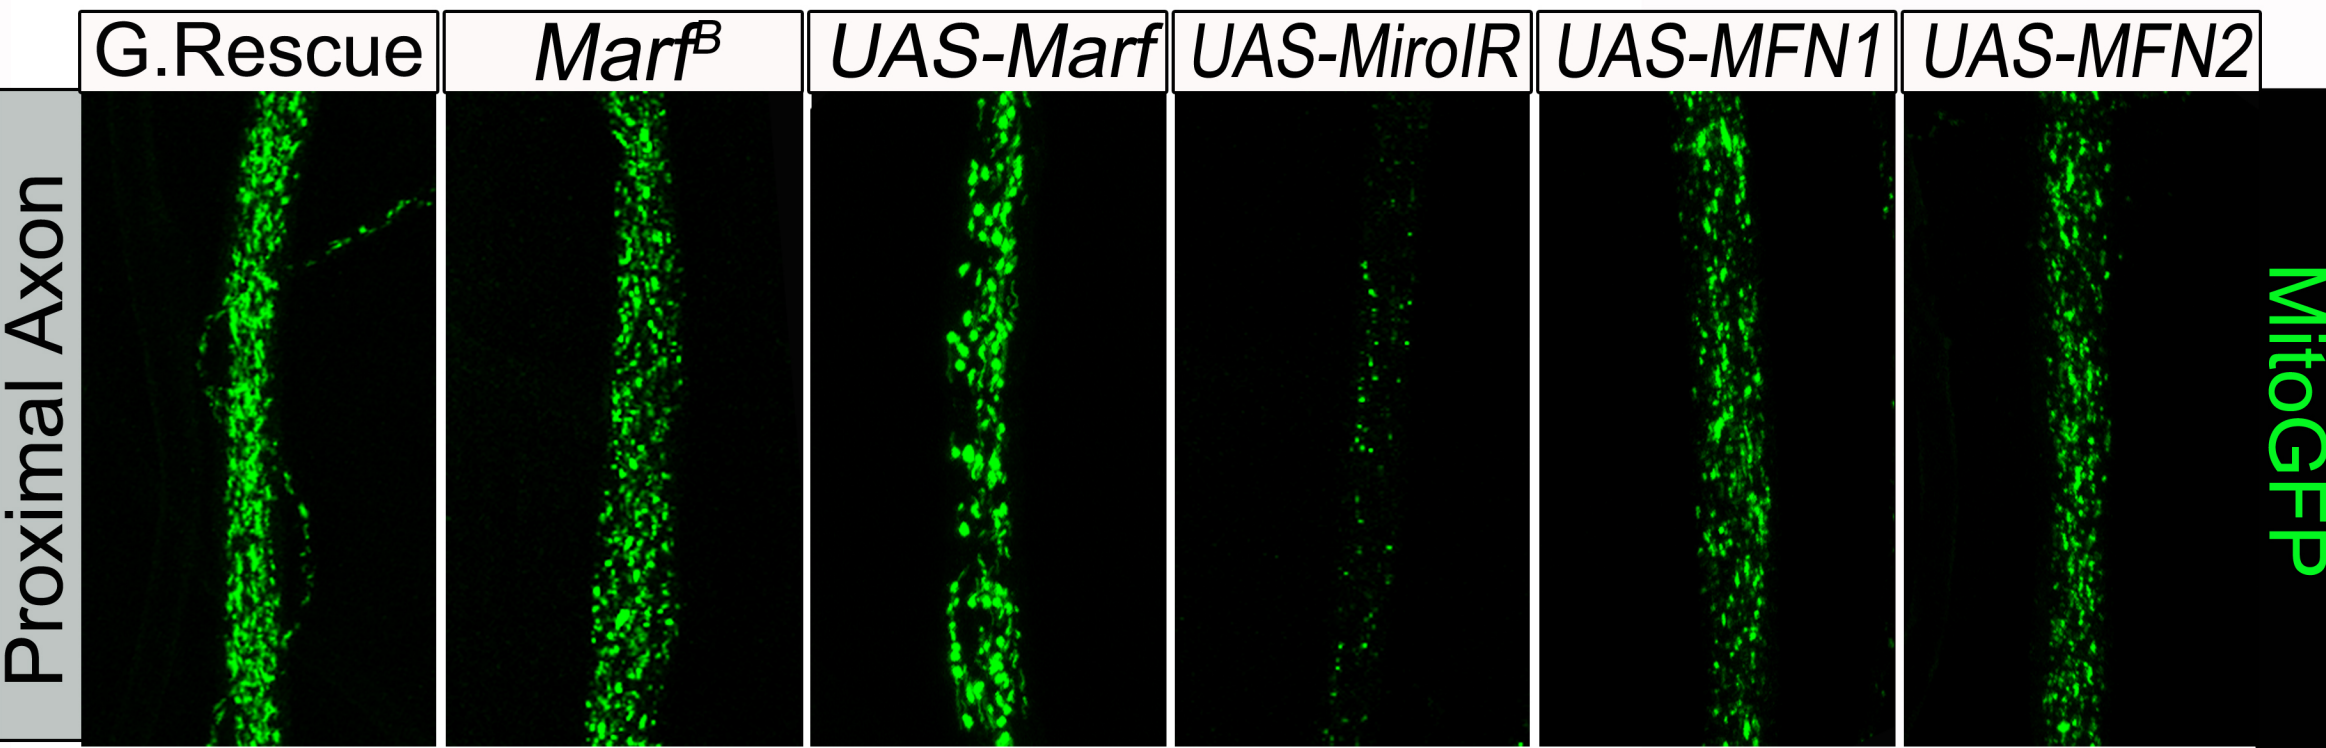

**C**

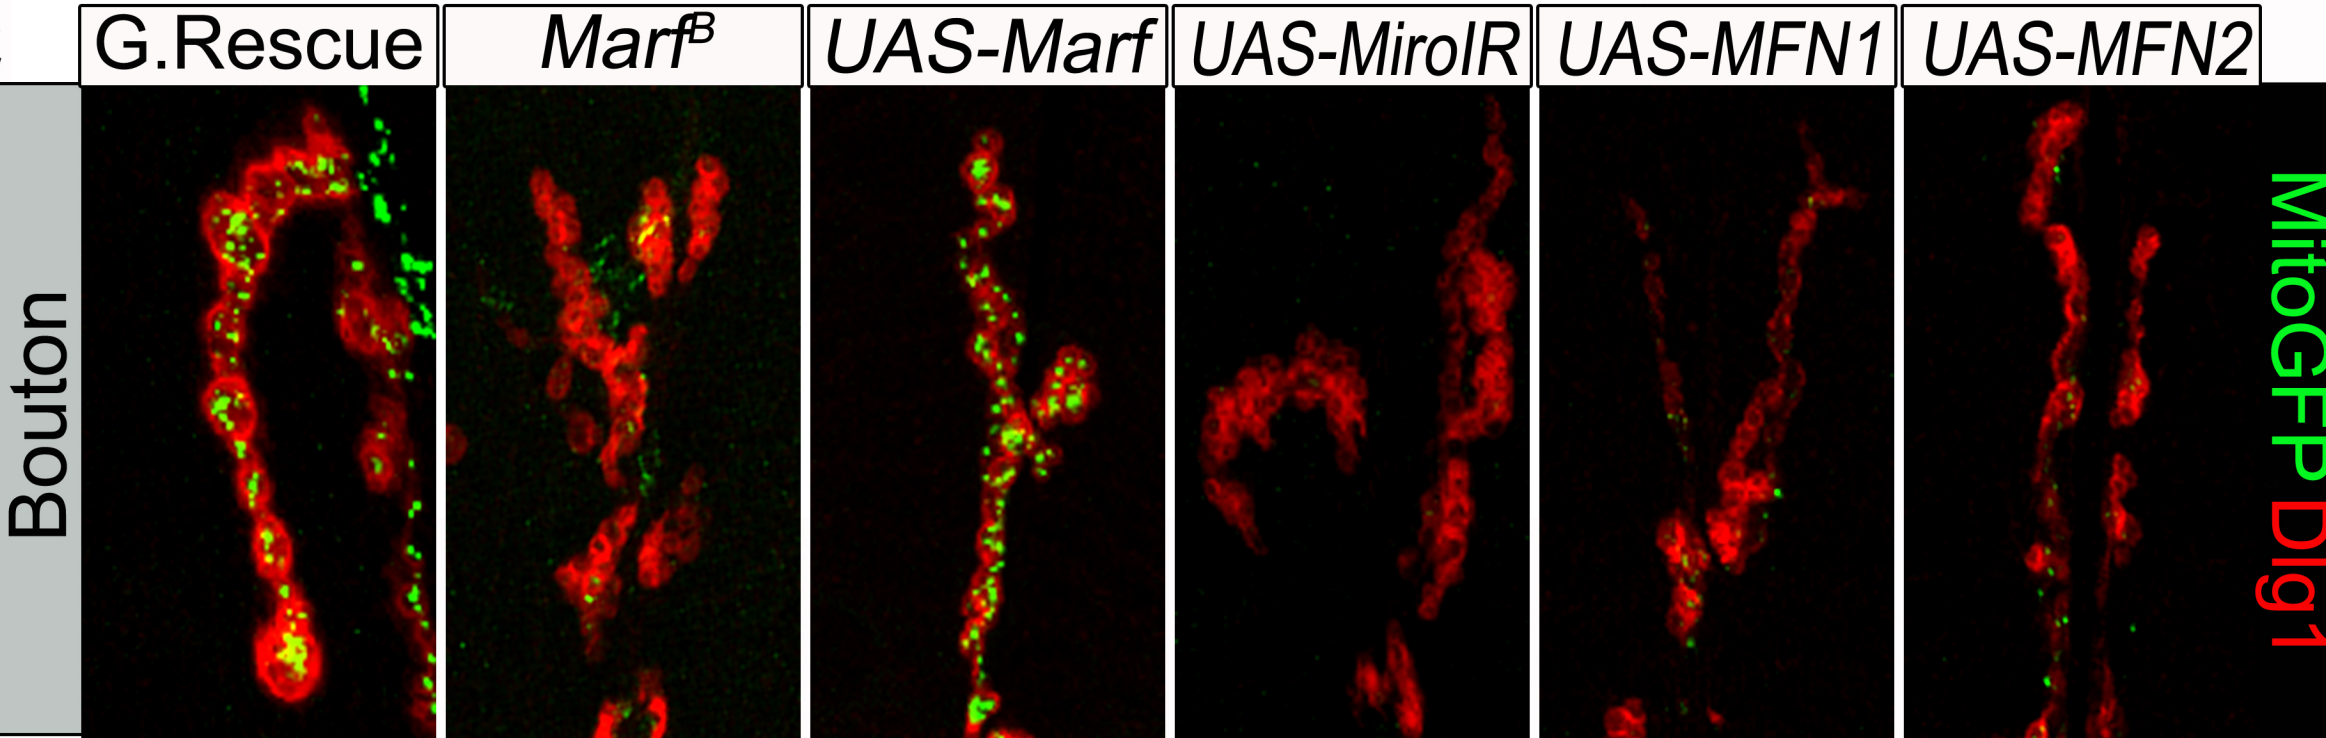

Supplement: supp [file elife-03558-supp-v1.zip › elife_poa_e03558_Figure_3_figure_supplement_2.pdf]

Figure 6-figure supplement 1

A

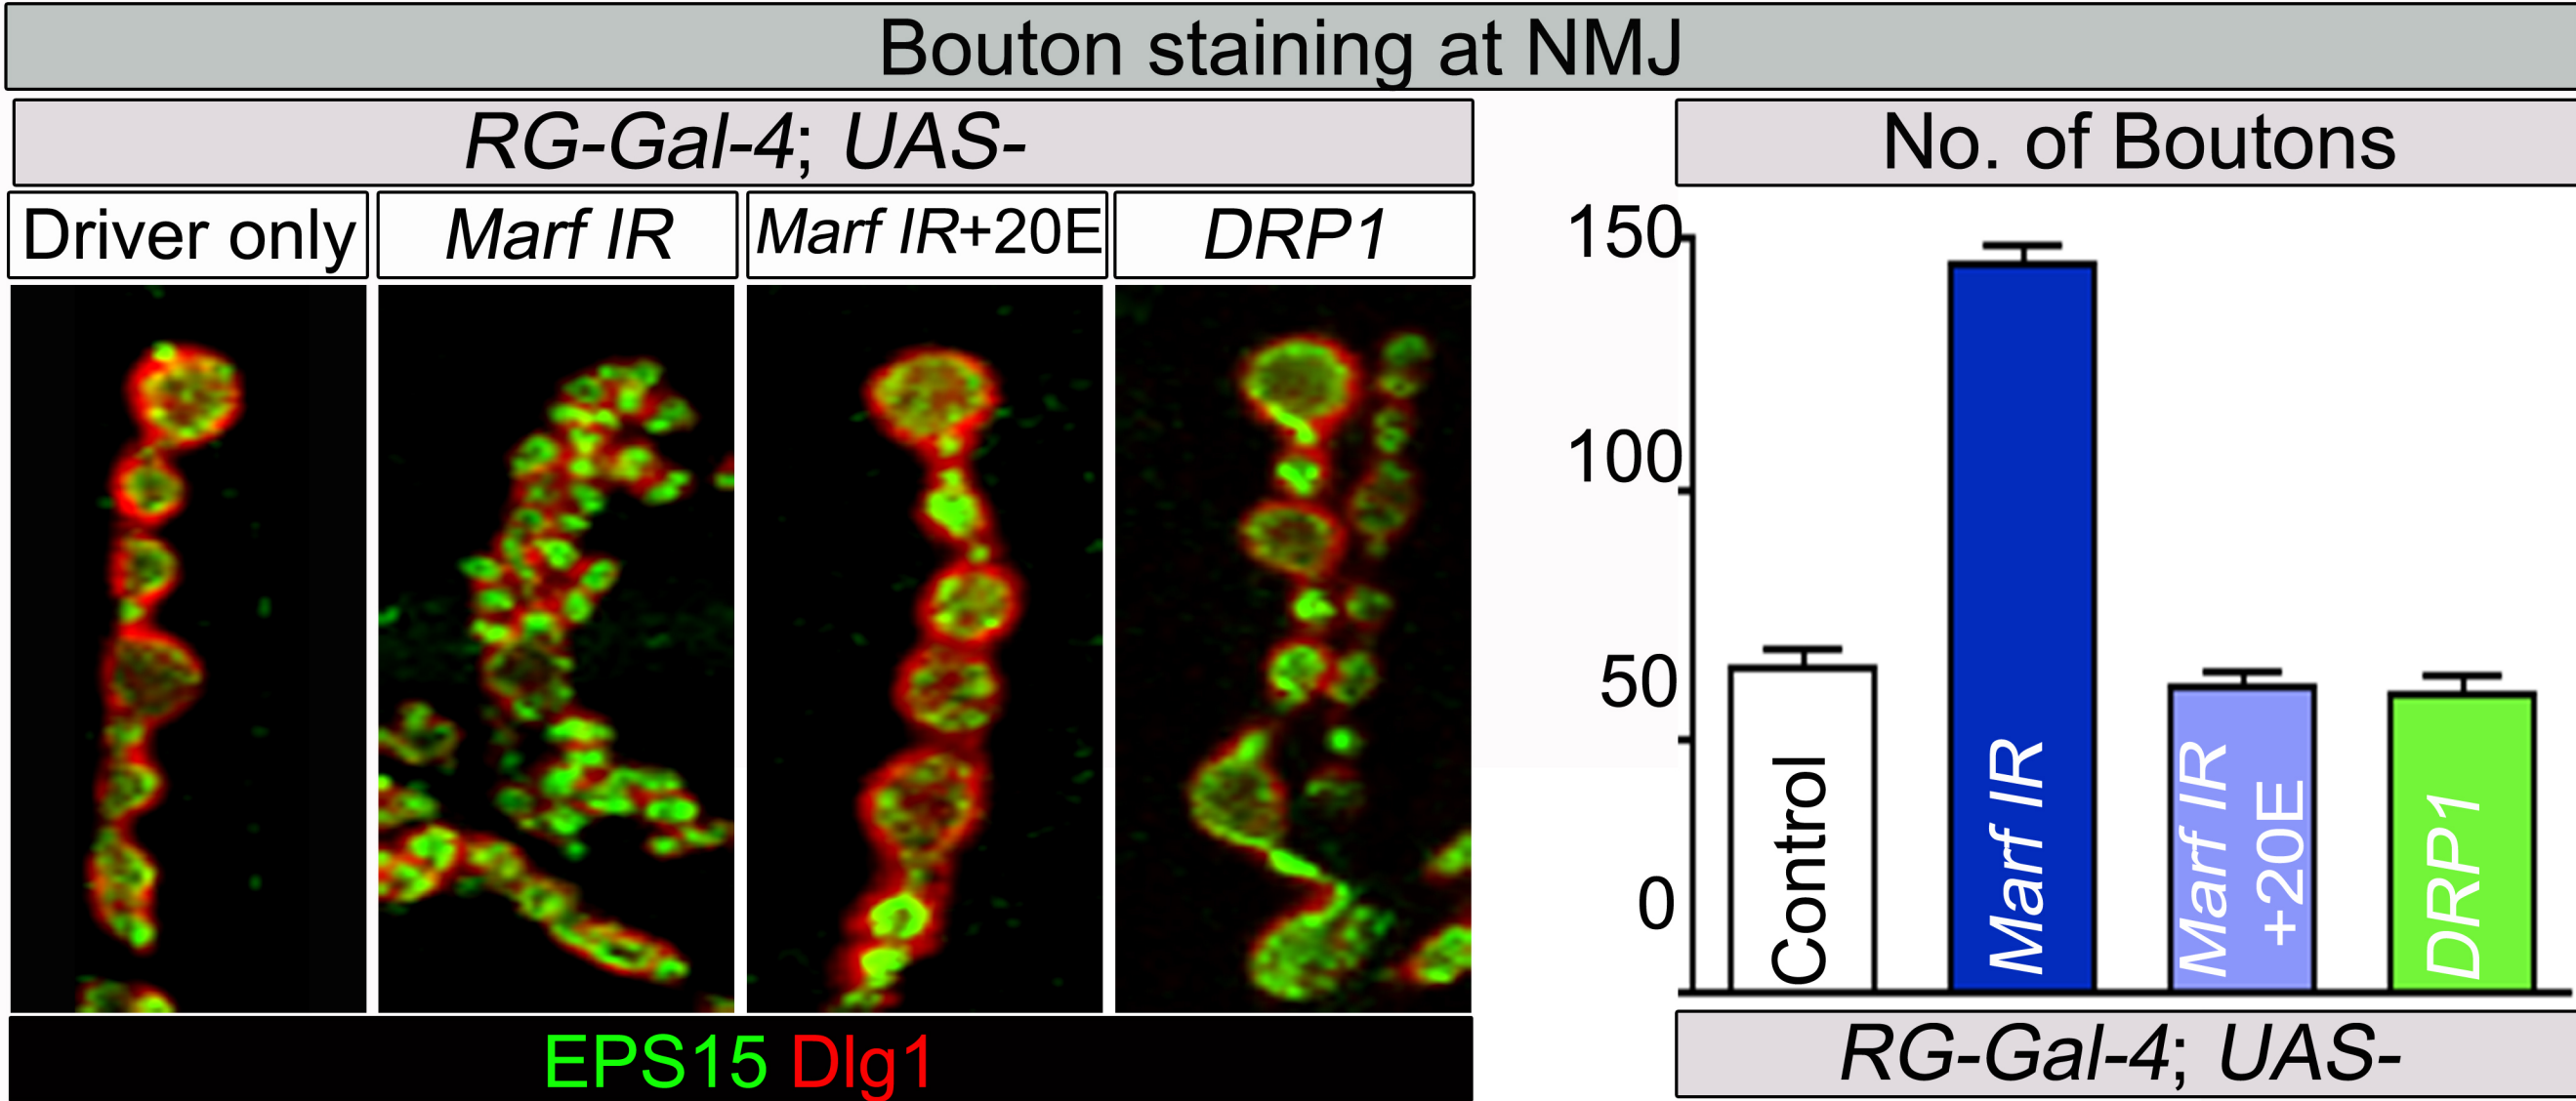

B

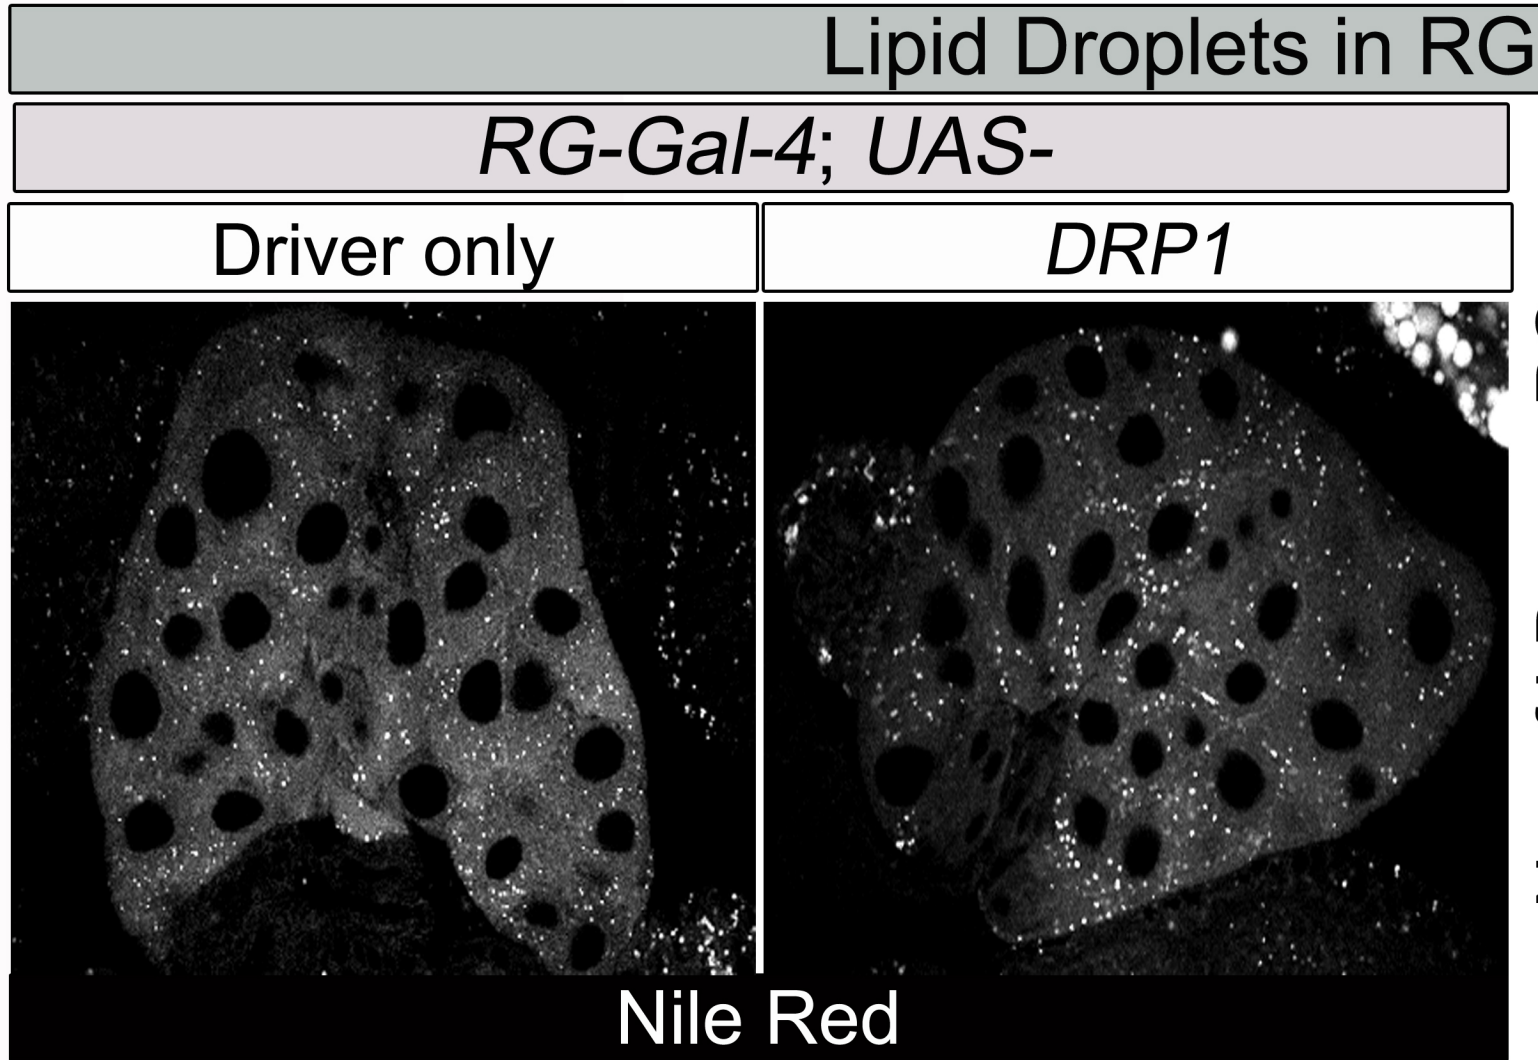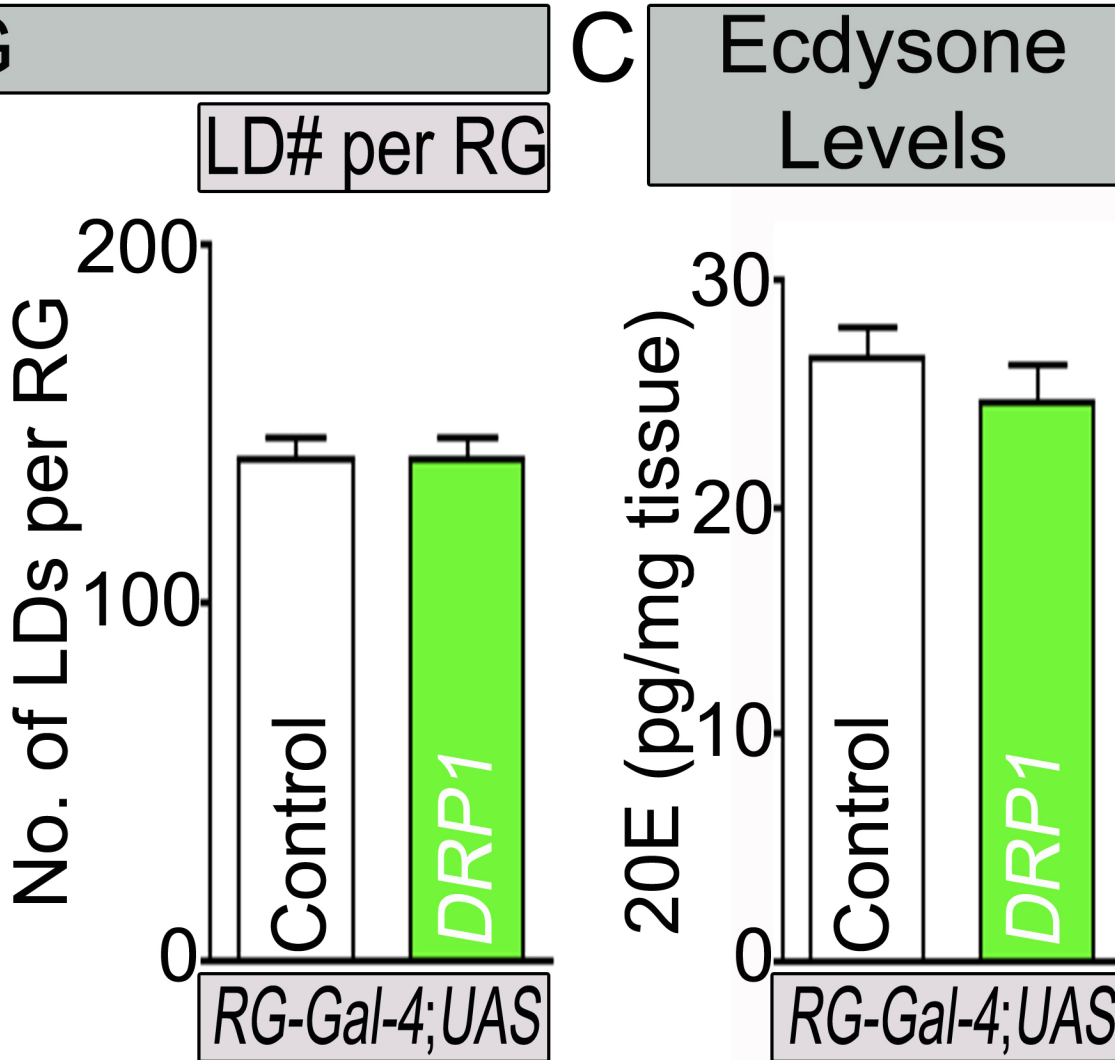

Supplement: supp [file elife-03558-supp-v1.zip › elife_poa_e03558_Figure_6_figure_supplement_1.pdf]

Figure 3-figure supplement 1

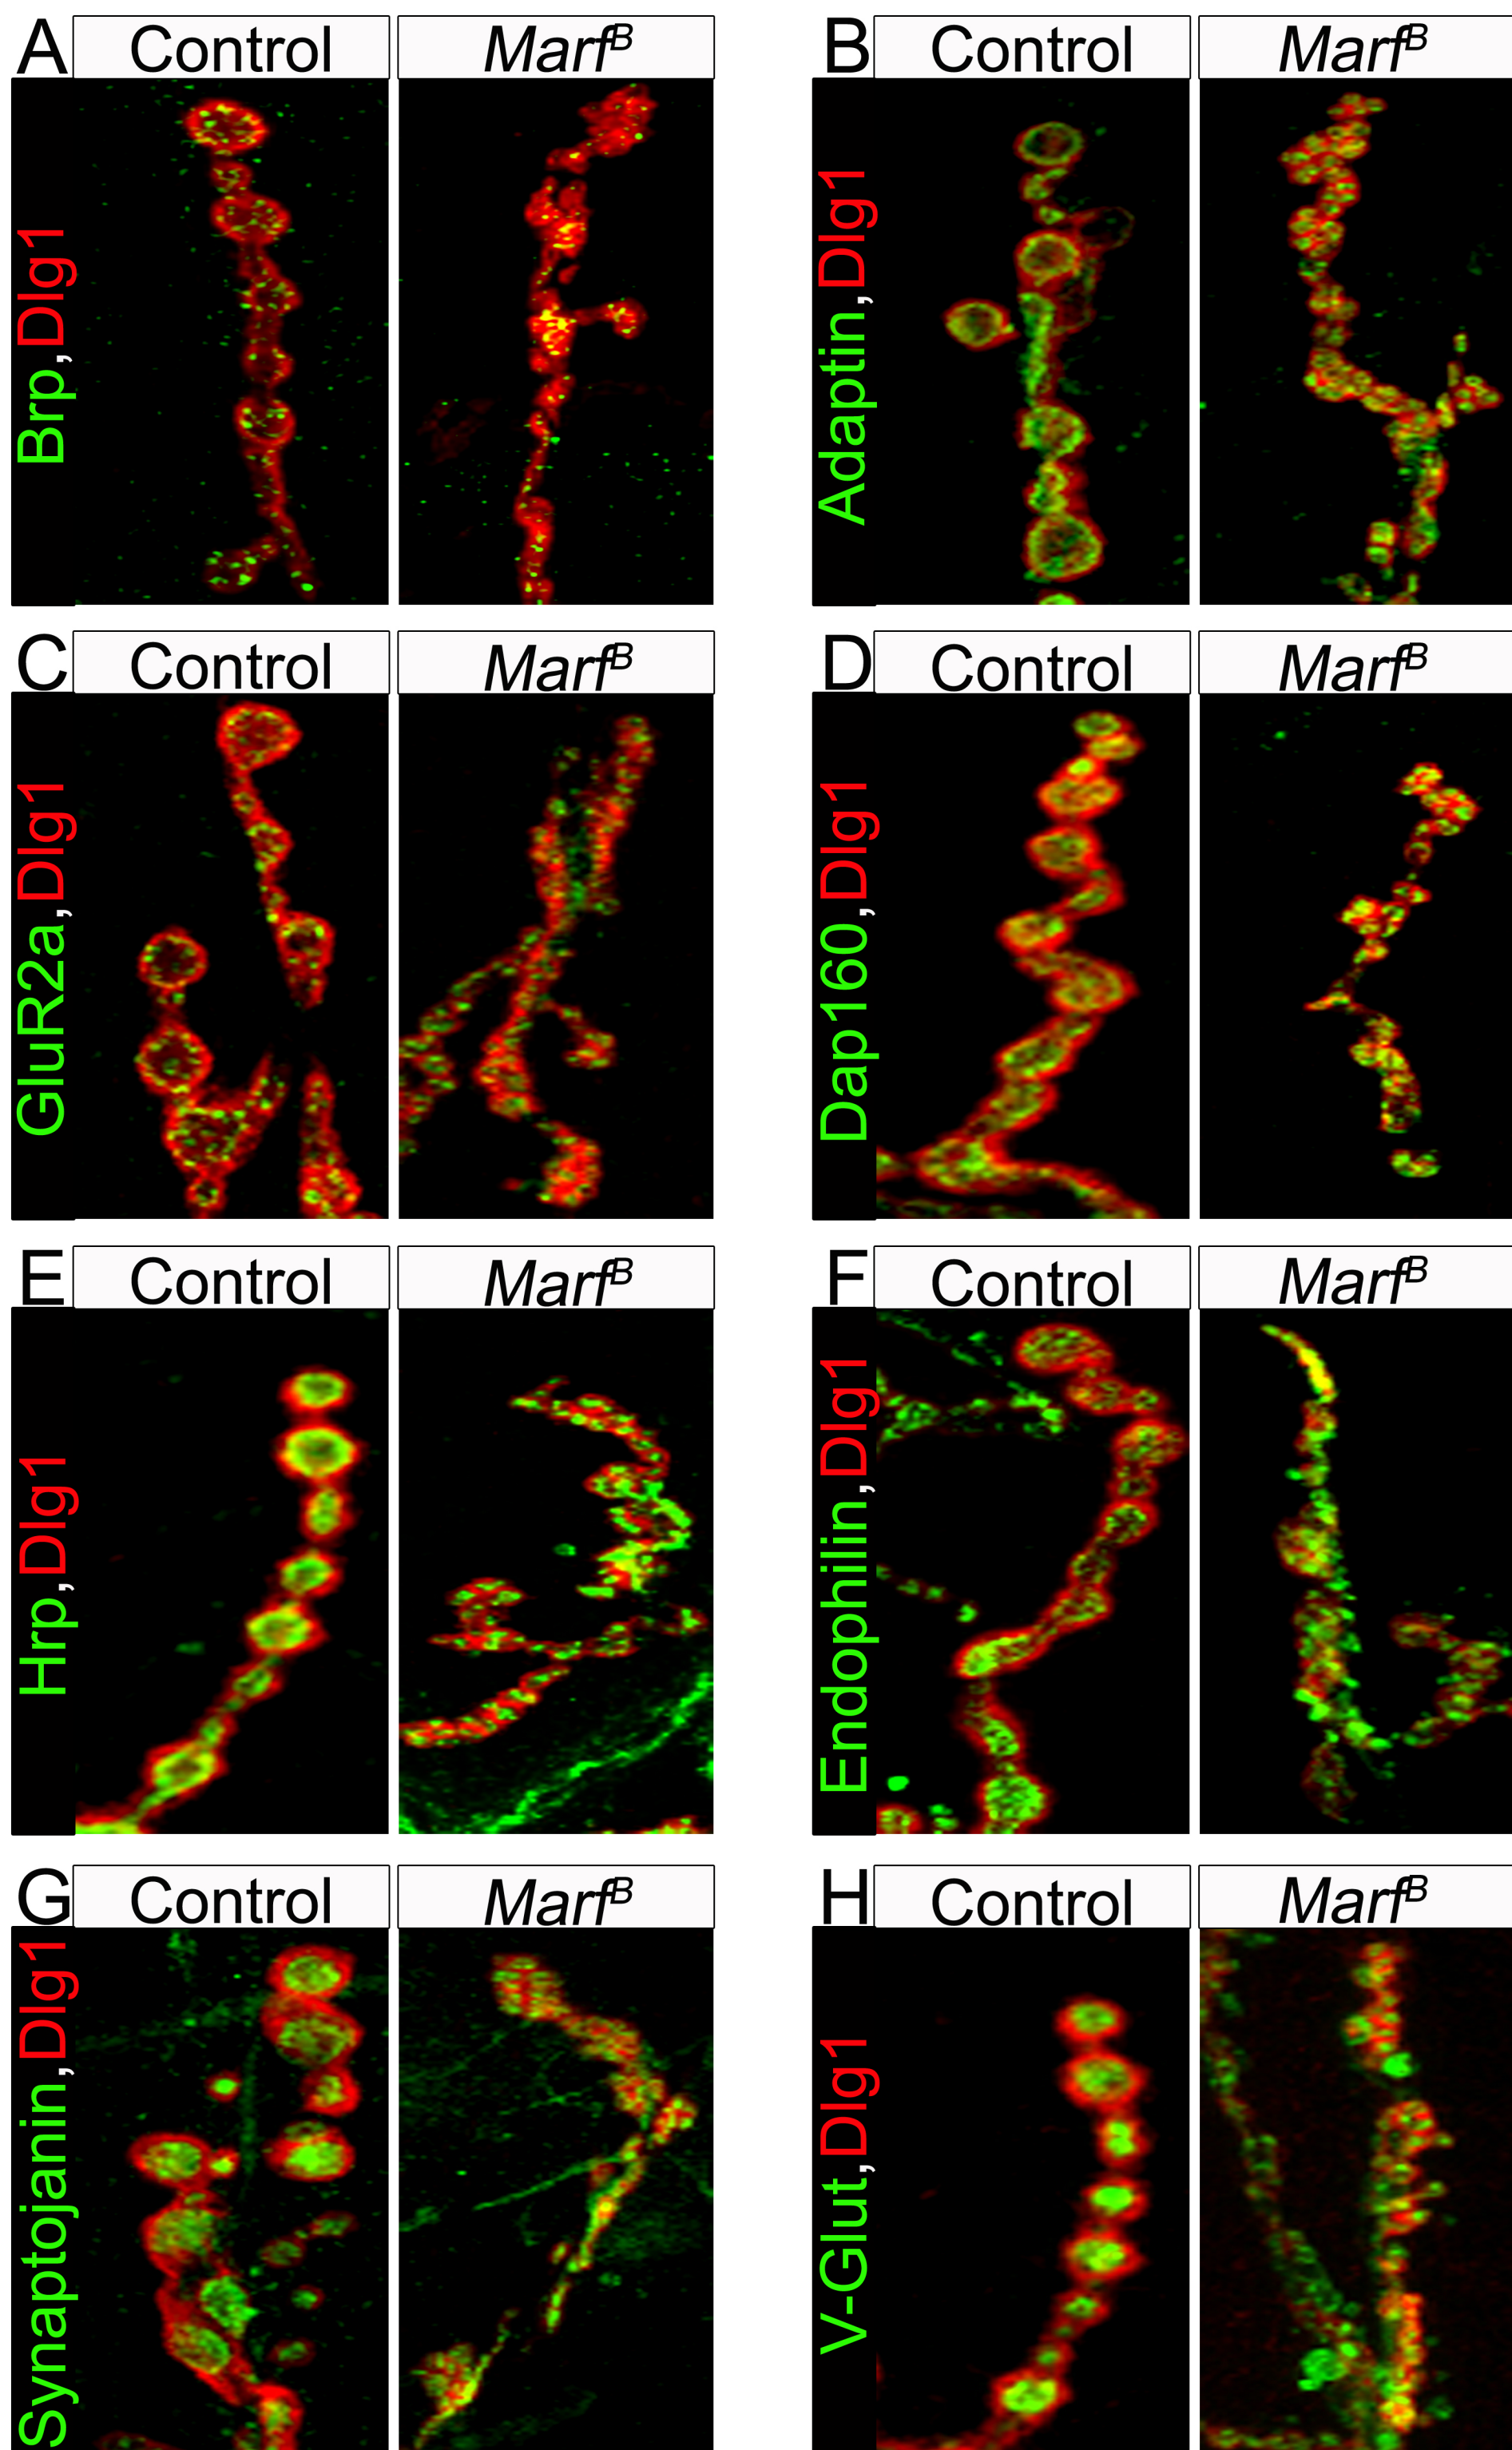

Supplement: supp [file elife-03558-supp-v1.zip › elife_poa_e03558_Figure_3_figure_supplement_1.pdf]

# Figure 5-figure supplement 1

## Ring gland driver specificity

*Feb36 Gal4 > UAS-GFP*

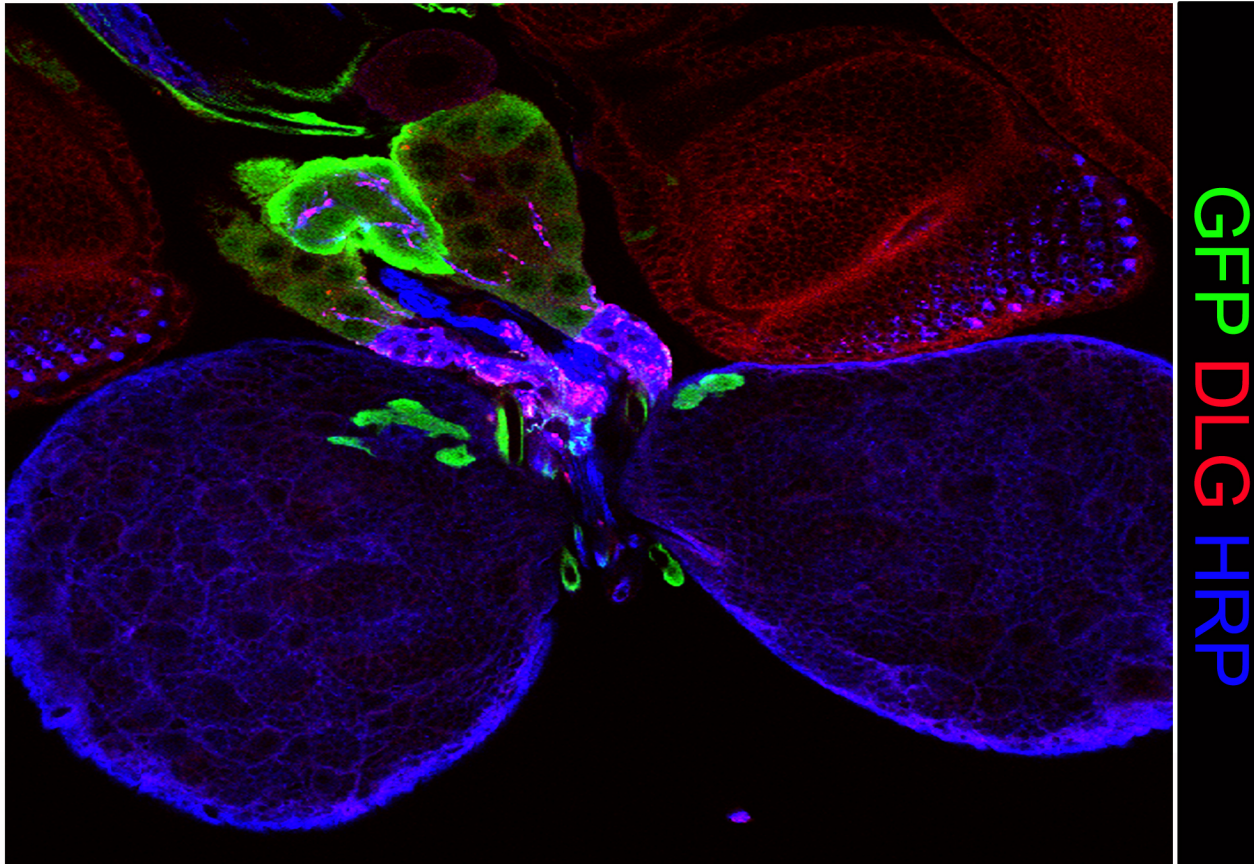

*Phm Gal4 > UAS-GFP*

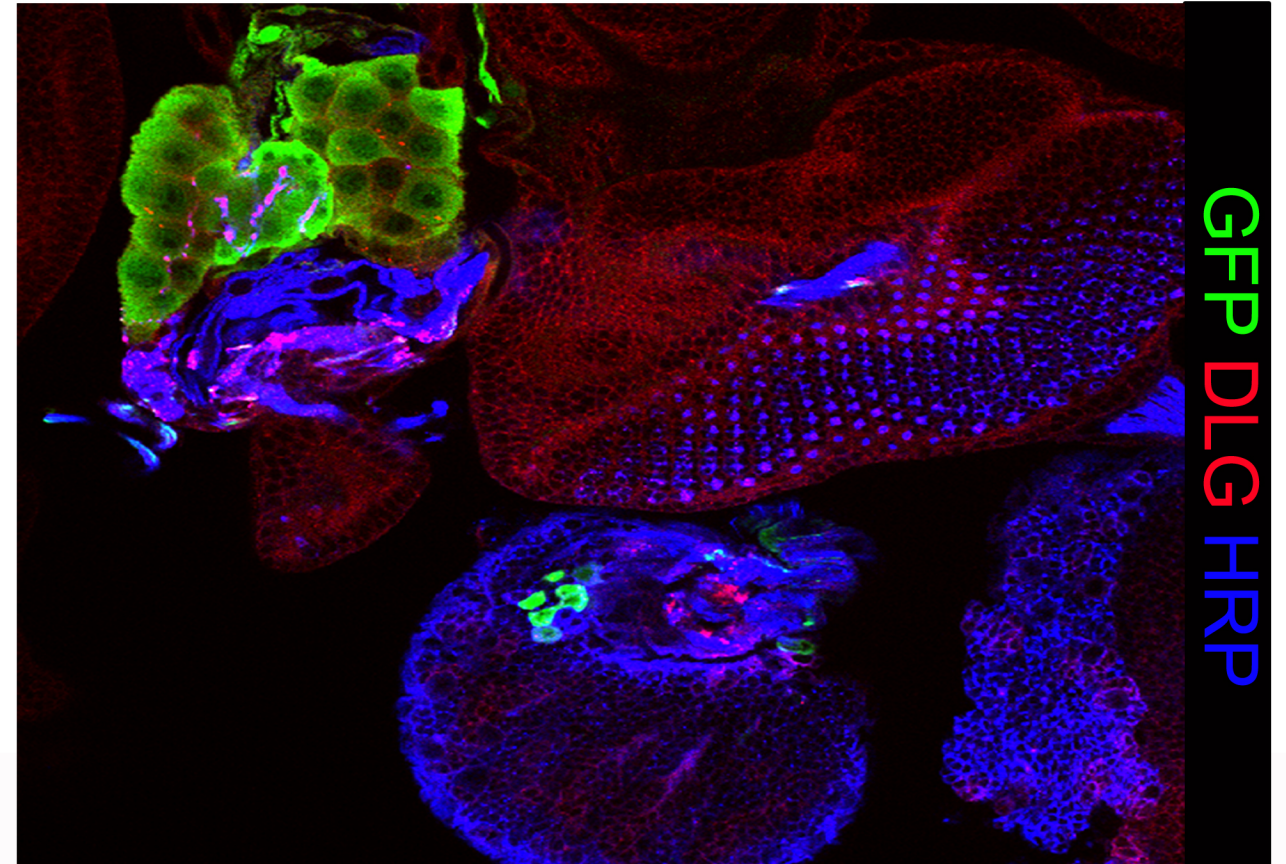

Supplement: supp [file elife-03558-supp-v1.zip › elife_poa_e03558_Figure_5_figure_supplement_1.pdf]

## Ultrastructure of the RG by TEM

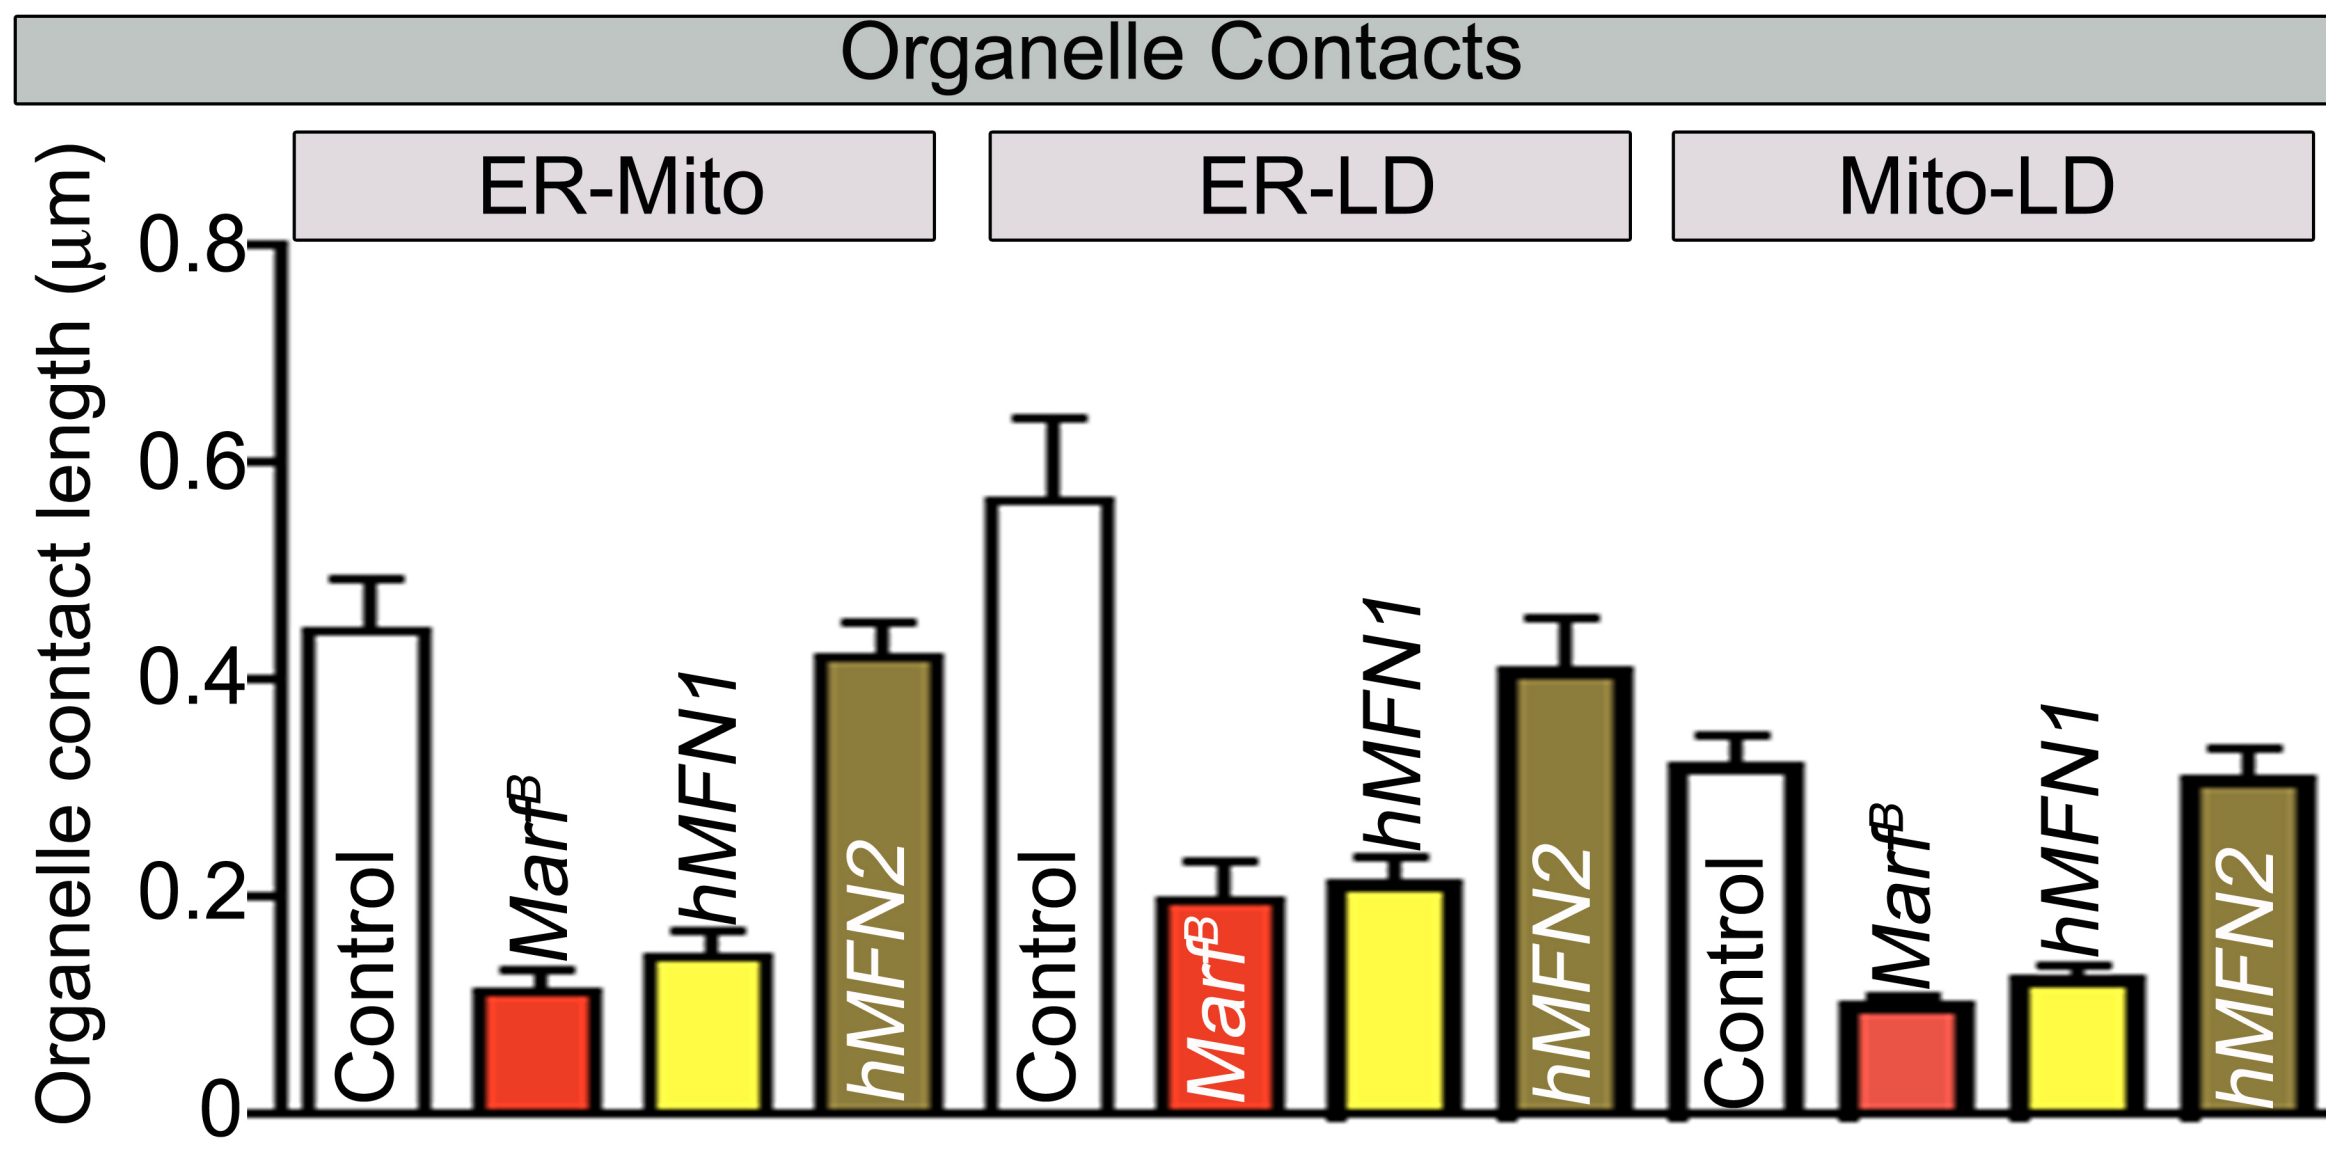

Supplement: supp [file elife-03558-supp-v1.zip › elife_poa_e03558_Figure_7_figure_supplement_1.pdf]
